# Supplementary material for: Modeling the Early Phenotype at the Neuromuscular Junction of Spinal Muscular Atrophy Using Patient-Derived iPSCs
Source: PubMed Central journal article supplement (PMC4400613; doi:10.1016/j.stemcr.2015.02.010), 2015-03-19
Supplement: mmc1.pdf [file mmc1.pdf]

**Stem Cell Reports, Volume 4**

**Supplemental Information**

**Modeling the Early Phenotype at the  
Neuromuscular Junction of Spinal Muscular Atrophy  
Using Patient-Derived iPSCs**

**Michiko Yoshida, Shiho Kitaoka, Naohiro Egawa, Mayu Yamane, Ryunosuke Ikeda,  
Kayoko Tsukita, Naoki Amano, Akira Watanabe, Masafumi Morimoto, Jun Takahashi,  
Hajime Hosoi, Tatsutoshi Nakahata, Haruhisa Inoue, and Megumu K. Saito**

**Figure S1**

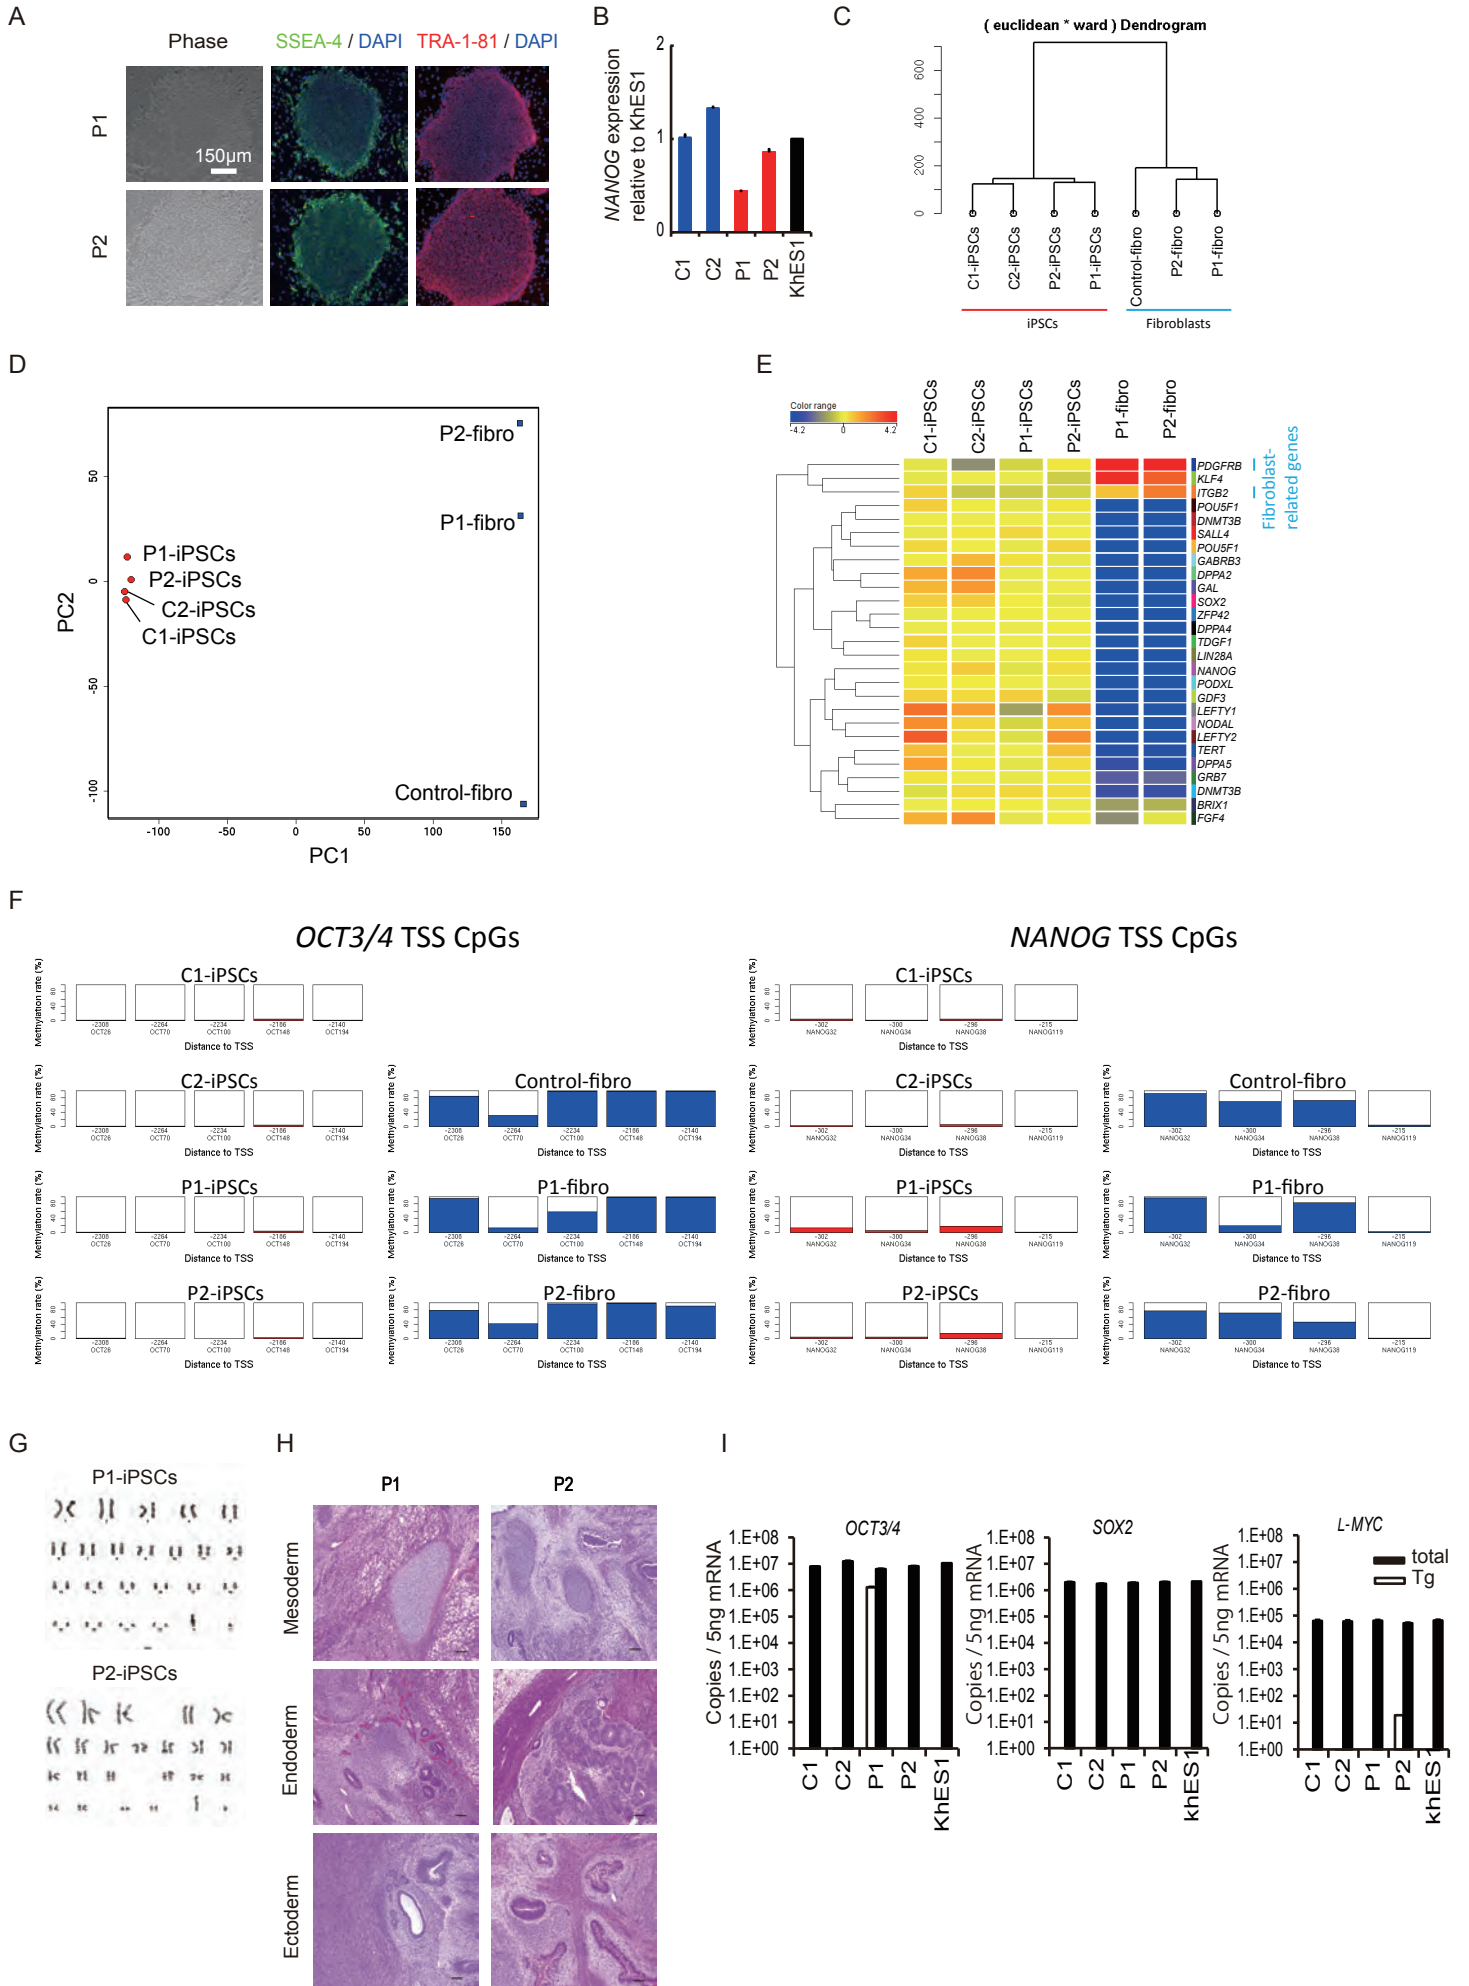

# Figure S2

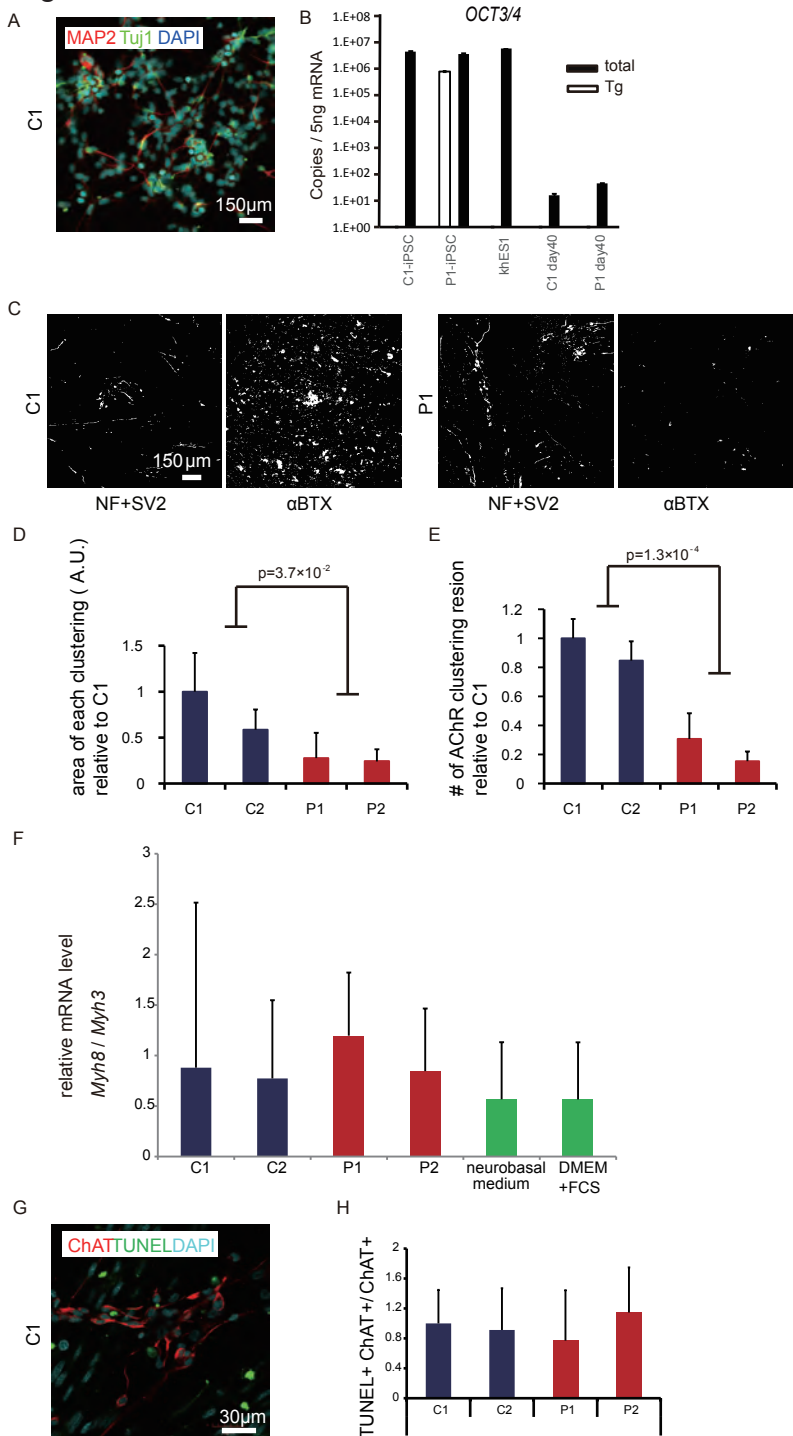

# Figure S3

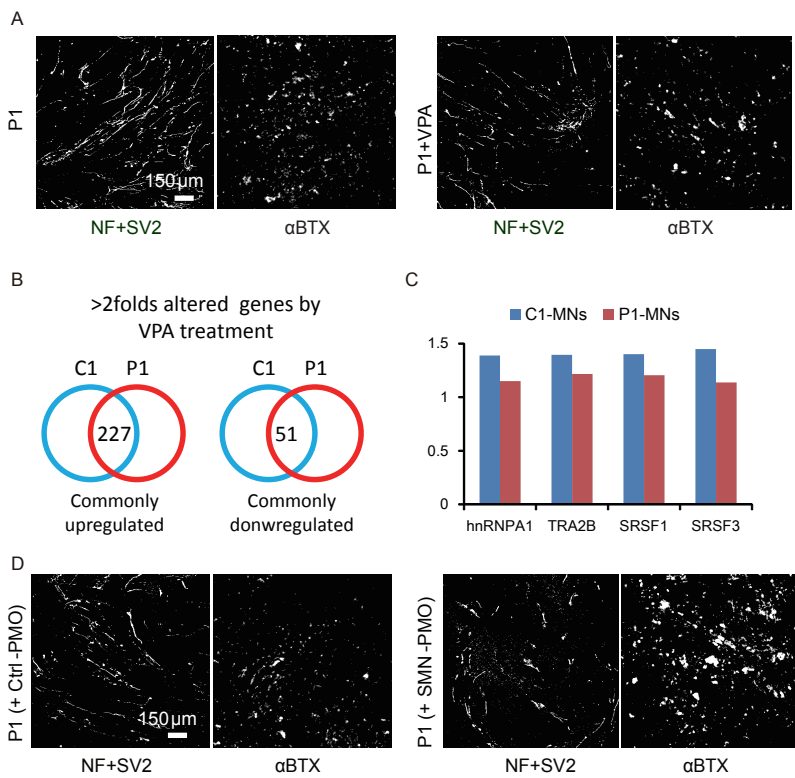

## Supplementary figure legends

### Figure S1: Generation and characterization of SMA patient-specific iPSCs, related to Figure 1.

(A) Phase contrast images of SMA-iPSCs (P1, P2) showing typical pluripotent stem cell colony morphology. The immunocytochemical analysis revealed the expression of embryonic stem cell surface markers, SSEA-4, TRA-1-81. (B) The *NANOG* expression normalized to the *GAPDH* expression in control (C1, C2) and SMA-iPSCs (P1, P2) relative to hESCs (KhES1). Data are the means  $\pm$ SEM of triplicate samples. (C-E) Microarray analysis of iPSC clones. Control-fibroblasts are commercially available fibroblasts from a healthy volunteer. (C) Hierarchical clustering and (D) principal component analysis of iPSCs and parental fibroblasts. (E) Heatmap of gene sets preferentially expressed in pluripotent stem cells. (F) Methylation analysis of *OCT3/4* and *NANOG* promoter regions. Color boxes indicate methylated while white boxes indicate demethylated allele. (G) Karyotype analysis of iPSCs. (H) Teratoma formation assay showing successful differentiation of iPSCs into three germ layers. (I) The results of the quantitative RT-PCR analyses of *OCT3/4*, *SOX2* and *L-MYC* expression in control and SMA-iPSCs relative to hESCs (KhES1). “Tg” indicates primers detecting the transgene only, whereas “total” indicates primers detecting both the endogenous gene and the transgene. Scale bars: 100  $\mu$ m. The data are the means  $\pm$ SEM of triplicate samples.

### Figure S2: Characteristics of iPSC-derived MNs and AChR clusters, related to Figure 2

(A) Immunostaining of SMA-iPSC-derived MNs. MAP2 (red) and Tuj1 (green) stained on day 40. (B) Quantitative RT-PCR analysis of the *OCT3/4* expression in the PSCs and PSC-derived MNs. The data are presented as the mean  $\pm$ SEM of triplicate samples. (C) Processed black and white images used for automatic area counting of neurons and AChR clustering. NF+SV2 indicates neuron-positive areas and  $\alpha$ BTX indicates AChR-clustering positive areas. (D) Quantitative analysis of the size of each AChR cluster. (means  $\pm$ SEM, n=3, Wilcoxon rank-sum test). (E) Quantitative analysis of the number of AChR clusters. (means  $\pm$ SEM, n=3, Wilcoxon rank-sum test). (F) Quantitative RT-PCR analysis of the expression of *Myh8* and *Myh3* genes in differentiated C2C12 myotubes. The ratio of *Myh8* to *Myh3* is shown. The data are presented as the mean  $\pm$ SEM of triplicate dishes. Neurobasal medium; monocultured C2C12 cells were with co-culturing medium. DMEM+FCS; monocultured C2C12 cells with their maintenance medium. (G) The representative immunostaining image of iPSC-derived MNs with TUNEL (green) and ChAT (red) and (H) their quantification. The data are presented as the mean  $\pm$ SEM of triplicate dishes.

### Figure S3: Effect of VPA and PMO treatment on AChR clustering, related to Figure 3 and Figure 4.

(A) Processed black and white images used for automatic area counting of neurons and AChR clustering with or without VPA treatment. (B) Summary of RNA-seq analysis. (C) Expression levels of splicing factors (*SF2/ASF*, *Htra2- $\beta$ 1*, *SRp20*, *hnRNPA1*) with VPA treatment. Fold change to the expression levels without VPA treatment are shown. (D) Processed black and white images used for automatic area counting of neurons and AChR clustering after PMO treatment.

**Table S1: list of genes upregulated by VPA treatment (>2 fold to compared to untreated), related to Figure**

3.

|                                                  |                     |                       |
|--------------------------------------------------|---------------------|-----------------------|
| TRIM34+TRIM6+TRIM6-TRIM34                        | CALCB               | ARNTL                 |
| TMC6+TMC8                                        | FGFR4               | PPIC                  |
| ALS2CL                                           | NCEH1               | GSN                   |
| ETHE1                                            | TMEM176B            | SEMA3C                |
| BLVRB                                            | MITF                | WNT16                 |
| FLJ46906                                         | PIK3R5              | EPOR                  |
| PPFIBP2                                          | PPP1R1B             | MFAP2                 |
| PTPN3                                            | CACNA1G             | SMYD3                 |
| NRCN                                             | RTBDN               | MUM1L1                |
| PAQR5                                            | RIT2                | TAC3                  |
| AMBN                                             | AKR1C3              | TMEM255A              |
| DUX2+DUX4+DUX4L2+DUX4L3+<br>DUX4L5+DUX4L6+DUX4L7 | CXorf57             | STEAP1                |
| PAMR1                                            | PENK                | CRABP2                |
| FSTL5                                            | EGFL7               | DENND2C               |
| HOXD8                                            | PLEKHB1             | CAV2                  |
| DLEU1                                            | GPR50               | THEMIS2               |
| CCDC152+SEPP1                                    | NMNAT3              | ALPL                  |
| CPT1A                                            | ITM2A               | TMCC3                 |
| MT2A                                             | GLYATL1             | GXYLT2                |
| TMEM74                                           | DPYD+DPYD-AS1       | HLA-B                 |
| HLA-C                                            | GABRE               | ATP8B3                |
| PRSS12                                           | RAB7L1              | LGALS1                |
| CREG1                                            | HLA-F+HLA-F-AS1     | DNAJC12               |
| SLC35F2                                          | KCNJ4               | IF16                  |
| FXD1                                             | HEPH                | IGSF1                 |
| DHRS2                                            | ABCB1               | CDK18                 |
| C4orf32                                          | LRAT                | TRAM1L1               |
| NPAS1                                            | VAV3                | MIR1324               |
| IL17RA                                           | GPR158+GPR158-AS1   | UTS2                  |
| PLCL1                                            | SNORD114-8          | GPC5                  |
| PLCG2                                            | SERPINI1            | PLEKH2                |
| DAPL1                                            | CHRM4               | IRF6                  |
| LPA                                              | KCNIP2+LOC100289509 | DPP10                 |
| NMRK1                                            | CHRD1               | SULT1C4               |
| TSPAN33                                          | C9orf135            | STAT4                 |
| USH2A                                            | TESC                | PAIP2B                |
| IL16+STARD5                                      | PRKCB               | ARHGAP18              |
| PPAP2C                                           | KCTD19+PLEKHG4      | C19orf77              |
| TNNT1                                            | TMEM176A            | PRKCC                 |
| ENPP5                                            | GABRD               | PPM1J                 |
| RASGRP2                                          | CRYM                | LPCAT2                |
| SNORD61                                          | HOXB7               | PRKCG                 |
| HAPLN4                                           | PDGFRA              | C1orf115              |
| FBLN2                                            | ADRA1A              | GRAMD1C               |
| ARHGAP26                                         | HPCA+TMEM54         | TFEB                  |
| COL6A2                                           | HERC5               | ULBP1                 |
| DUSP23                                           | KCNH3               | ANO5                  |
| CHRN4                                            | OSTF1               | TEX15                 |
| HLA-DPA1+HLA-DPB1                                | RAB11FIP1           | GALNT10               |
| SPAG6                                            | MT1F                | MIR5586               |
| C3orf52                                          | TPD52L1             | RXRG                  |
| CYP2J2                                           | SLC17A7             | CD163L1               |
| GALP                                             | GMPR                | C1QTNF9B+C1QTNF9B-AS1 |
| STEAP1B                                          | C4orf33             | SLC2A4                |
| SELL                                             | CRLF1               | TINCR                 |
| CRHR2                                            | SNORA74A            | LOC650368             |
| CLDN6                                            | TSPAN15             | ALDH1A1               |
| TMPRSS15                                         | SCPEP1              | SUSD3                 |
| IL13RA2                                          | EDA                 | MIR3193               |
| CD40                                             | CLGN                | C17orf96              |
| RGS10                                            | H2AFJ               | DGAT2                 |
| MIR548AQ+MIR548AR                                | CD74                | STAC2                 |
| C1QL1                                            | MRAP2               | SLC18A3               |
| ITGA5                                            | SYNPR               | MIR7-3HG              |
| GPX3                                             | MIR4324             | RNF128                |
| NDST4                                            | PLA2G4A             | RLN2                  |
| PCBP3                                            | ABCD2               | FAM19A4               |
| HLA-DMB                                          | FTCD                | RBM11                 |
| COL9A2                                           | IF130               | C10orf128             |
| TNNI3                                            | A4GALT              | LOC100506013          |
| MICB                                             | SLC9A9              | RASD2                 |
| LOC401074                                        | ARID5A              | FAM101B               |
| LOC401074                                        | IMPA2               | NRTN                  |
| MIR4735                                          | MGARP               | CHST9                 |
| SCGN                                             | GPR37               | ANKRD20A19P           |
| ITIH5                                            | SPINK2              |                       |

**Table S2: list of genes downregulated by VPA treatment (>2 fold to compared to untreated), related to Figure 3.**

|                                                 |                      |                   |
|-------------------------------------------------|----------------------|-------------------|
| EFCAB2                                          | HYH+SZT2             | MYD88             |
| LINC00261                                       | C4A+C4B+LOC100293534 | LRFN4             |
| TM4SF1                                          | OBSL1                | CLEC18A           |
| BGLAP+PMF1+PMF1-BGLAP                           | GDPD2                | SNORD4B           |
| SNORD38B                                        | ATP1A2               | SNORD21           |
| LPL                                             | MIR93                | MIR568            |
| SNORD115-11+SNORD115-29+SNORD115-36+SNORD115-43 | SERPINH1             | ACSS1             |
| LANCL2                                          | SLC27A3              | SNORD88A          |
| AIFM2+H2AFY2                                    | C4A+C4B+LOC100293534 | SNORD12C          |
| GLYCTK+MIR135A1                                 | ACTG2                | SOCS3             |
| CLEC18C                                         | MARVELD1             | HIST1H2BC         |
| MLC1                                            | PDGFRB               | MIR219-2+MIR2964A |
| SNORA51                                         | RCBTB2               | FADS2             |
| MOV10                                           | MIRLET7D             | TAGLN             |
| GTF2IRD2                                        | MIR4508              | MIR1305           |
| MIR3175                                         | MIR106B              | CLEC18B           |
| GTF2IRD2P1                                      | SLC16A14             | GTF2IRD2B         |

**Table S3: primer sequences for PCR analysis, related to Figure 1-4.**

| primer name             | Sequences (5' to 3')               |
|-------------------------|------------------------------------|
| <i>NANOG</i>            | CCA AAG GCA AAC AAC CCA CTT        |
|                         | GAC CGG GAC CTT GTC TTC CT         |
| <i>GAPDH</i>            | ACC ACA GTC CAT GCC ATC AC         |
|                         | TCC ACC ACC CTG TTG CTG TA         |
| total <i>OCT3/4</i>     | CCC CAG GGC CCC ATT TTG GTA CC     |
|                         | ACC TCA GTT TGA ATG CAT GGG AGA GC |
| transgene <i>OCT3/4</i> | CAT TCA AAC TGA GGT AAG GG         |
|                         | TAG CGT AAA AGG AGC AAC ATA G      |
| total <i>SOX2</i>       | TTC ACA TGT CCC AGC ACT ACC AGA    |
|                         | TCA CAT GTG TGA GAG GGG CAG TGT GC |
| transgene <i>SOX2</i>   | TTC ACA TGT CCC AGC ACT ACC AGA    |
|                         | TTT GTT TGA CAG GAG CGA CAA T      |
| total <i>L-MYC</i>      | GCG AAC CCA AGA CCC AGG CCT GCT CC |
|                         | CAG GGG GTC TGC TCG CAC CGT GAT G  |
| transgene <i>L-MYC</i>  | GGC TGA GAA GAG GAT GGC TAC        |
|                         | TTT GTT TGA CAG GAG CGA CAA T      |
| <i>SMN-FL</i>           | CAAAAAGAAGGAAGGTGCTCACATT          |
|                         | GTGTCATTTAGTGCTGCTCTATGC           |
| <i>SMN-Δ7</i>           | CTTGATGATGCTGATGCTTTGGGAAG         |
|                         | CTATGCCAGCATTTCATATAATAGCCAG       |
| <i>GAPDH</i>            | GTGGACCTGACCTGCCGTCT               |
|                         | GGAGGAGTGGGTGTCGCTGT               |
| <i>Myh3</i>             | TGAGATTGCAGGATCTGGTGG              |
|                         | CTCATGCTGGGCTTTCCTGA               |
| <i>Myh8</i>             | GCCGGGAGGTTACACCAAA                |
|                         | AAACCCAGAGAGGCAAGTGA               |



## Supplementary experimental procedures

### Study approval

Use of human ESCs was approved by the Ministry of Education, Culture, Sports, Science and Technology of Japan (MEXT). The study plan for recombinant DNA research has been approved by recombinant DNA experiments safety committee of Kyoto University. An experimental protocol was approved by the Animal Research Committee of Center for iPS cell research and application, Kyoto University.

### Cell lines

The following fibroblasts were obtained from the NIGMS Human Genetic Cell Repository at the Coriell Institute for Medical Research: [GM00232, GM03813]. Donors of both fibroblasts were described as having SMA type I. The iPSCs generated from the GM00232 and GM03813 fibroblasts were renamed CiRA00070 and CiRA00069, respectively, according to the institutional regulations. A human embryonic stem cell line, KhES1, was kindly provided by Dr. Hirofumi Suemori (Institute for Frontier Medical Sciences, Kyoto University, Kyoto, Japan). The human iPS cell lines, 201B7 and 409B2, were kindly provided by Dr. Shinya Yamanaka (Center for iPS Cell Research and Application, Kyoto University, Kyoto, Japan). The murine myoblast cell line, C2C12, was kindly provided by Dr. Atsuko Sehara-Fujisawa (Institute for Frontier Medical Sciences, Kyoto University, Kyoto, Japan).

### Establishment of iPSCs

Episomal vectors encoding reprogramming factors (*OCT3/4*, *SOX2*, *KLF4*, *L-MYC*, *LIN28* and p53 shRNA) were transduced into fibroblasts on day 0 as described previously (Okita et al., 2011). Plasmids were kindly provided by Dr. Keisuke Okita (CiRA, Kyoto University). The transfected cells were reseeded onto feeder layers on day 7, and maintained in embryonic stem cell medium (ReproCELL). Around day 30, the iPSC colonies were picked up as usual.

### RNA isolation and quantitative PCR

Total RNA extraction from cells was performed using the RNeasy Mini kit (QIAGEN). One microgram of total RNA was used for reverse transcription with the PrimeScript RT Master Mix (TaKaRa). The real-time PCR was performed with SYBR Premix Ex TaqII (TaKaRa) in triplicate using the StepOnePlus system (Applied Biosystems). *GAPDH* was used as an endogenous control. The primer sets used for the quantitative PCR assay are described in **Table S3**.

### Teratoma formation

The iPSCs recovered from one 6 cm dish were injected subcutaneously into NOG mice (Central Institute for Experimental Animals). Tumors were dissected eight weeks after injection and were fixed with PBS containing 4% paraformaldehyde. Paraffin-embedded tissues were sliced and stained with hematoxylin and eosin. Slides were examined using a BIOREVO BZ-9000 system (KEYENCE).

### Genotyping (PCR-RFLP)

The methods used to detect homozygous *SMN1* exon 7 and 8 deletions were described previously (van der Steege et al., 1995). In brief, the restriction enzymes Dra I and Dde I cleave the PCR products originating only from *SMN2*, enabling *SMN1*-derived PCR products to be distinguished from those of *SMN2*. The completely

digested band corresponds to the deletion of exons 7 or 8 in *SMN1*. The results of the PCR electrophoresis were analyzed by a bioanalyzer (Agilent)(Burrell et al., 2011).

### **Protein isolation and Western blot analysis**

Cells were isolated, suspended in M-PER (Thermo SCIENTIFIC), supplemented with 1% protease inhibitor cocktail (Sigma) and centrifuged at 20,000 g for 15 min at 4°C. A total of 3.125 µg of protein extracted from each sample was separated on 10% SDS-polyacrylamide gels, transferred to a nitrocellulose membrane, probed with a primary antibody against SMN (1:20,000; BD #610647), followed by horseradish-peroxidase-conjugated secondary antibody (1:10,000; Cell Signaling), and then visualized using ECL chemiluminescence reagents (Amersham). As a control, membranes were stripped and re-probed for β-actin (1:1,000; Cell Signaling #4970S). Quantitative densitometry analysis was performed using ImageQuant LAS 4000 software.

### **Immunocytochemistry and microscopy**

Cells were fixed and permeabilized for 30 min at room temperature in 4% paraformaldehyde and 0.2% TritonX-100, and incubated with Block Ace (DS PHARMA BIOMEDICAL) to prevent any non-specific binding before overnight incubation with primary antibodies at 4°C. The following day, secondary antibody incubations were performed for 1 hour with the appropriate species-specific antiserum coupled to either FITC, Cy3 (Jackson ImmunoResearch, 1/100) or Alexa594 conjugated α-bungarotoxin (α-BTX) (Invitrogen #B13423, 1/500). After staining nuclei with DAPI (1/1,000), the cells were mounted utilizing Vectashield (Vector laboratories) and imaged using a LV1000 confocal microscope (Olympus). All antibodies were diluted in Block Ace. The following primary antibodies were used at the indicated concentrations: neurofilament 160 kDa (Millipore #MAB5254, 1/1000), Tuj1 (Covance #MMS435P, 1/2000), MAP2 (Sigma #M2320, 1/1000), HB9 (DSHB #81.5C10, 1/100), ChAT (Millipore #AB144P, 1/200), anti-synaptic vesicle protein 2 (DSHB #SV2, 1/20), NF-H (abcam #ab4680, 1/5000), mAb35 (DSHB #mAb35, 1:1,000), MHC (Millipore #A4.1025, 1:1,000) and TUNEL (Promega, DeadEnd Fluorometric TUNEL System).

### **Quantification of the results of the immunocytochemical analysis**

Samples were imaged under identical gain and exposure settings. Only motor neurons containing a nucleus were counted in order to avoid double counting from adjoining sections. To calculate the average number of HB9-positive motor neurons, 12 visual fields in each preparation from each condition were counted using the BIOREVO BZ-9000 system (KEYENCE).

For the co-cultured samples, eight visual fields were evaluated and assessed in each preparation. Images were obtained with a 10x objective lens. For measurements, individual images of AChR clusters were imported into the ImageJ software program and split into red (endplate) and green (neurite and motor nerve terminal) channels. Each endplate and corresponding motor nerve terminal was automatically outlined and calculated using the IN Cell Analyzer 2000 software program (GE Healthcare Life Sciences), and areas greater than 427 pixels were kept as targets.

### **Microarray**

Total RNA was extracted and purified using RNA mini kit (QIAGEN) according to manufacturer's instruction. Gene expression analysis was performed using SurePrint G3 Human Gene Expression 8 × 60K kit (G4851A; Agilent technologies). Cy3-labelled cDNA was synthesized from 100 ng of RNA using Genomic DNA Enzymatic Labeling

Kit (Agilent Technologies). Labelled cDNA was fragmented with Gene Expression Hybridization Kit (Agilent Technologies), followed by hybridization at 65°C for 17 hrs. Images were acquired by DNA Microarray Scanner (Agilent Technologies). The data were normalized by 75 percentile shift using the GeneSpring GX 12.6.1 software (Agilent Technologies). Principle component analysis (PCA) was performed by R ver 3.1.0. Two-way hierarchical clustering analysis was performed using Ward's method based on Euclidean distance. Heatmap was illustrated by GeneSpring GX 12.6.1 using average method based on Euclidean distance.

### **DNA methylation analysis**

Genomic DNA was extracted and purified using PureLink Genomic DNA Mini Kit (Invitrogen) according to manufacturer's instruction. One µg of genomic DNA was subjected to bisulfite conversion of unmethylated cytosines of genomic DNA into uracils with EZ DNA Methylation Gold Kit (ZYMO Research). Promoter regions of *POU5F1* and *NANOG* were amplified by PCR from approximately 10 ng of bisulfite-treated DNA using Ex-taq (TaKaRa). PCR condition for *POU5F1* promoter was: 1 cycle of 98°C for 1 min, followed by 45 cycles of 98°C for 10 s, 60°C for 30 s, and 72°C for 1 min. That for *NANOG* promoter was: 1 cycle of 95°C for 3 min, followed by 40 cycles of 95°C for 30s, 58°C for 30 s, and 72°C for 1 min. Primers were: GTTTTTAGAGTAGTTGGGATTATAG and AACCCACCCTTATAAATTCTCAATTA for *NANOG*; ATTTGTTTTTTGGGTAGTTAAAGGT and CCAACTATCTTCATCTTAATAACATCC for *POU5F1*. Illumina libraries were generated by NEBNext Ultra DNA Library Prep Kit (New England BioLabs), and sequenced in 250 cycles Paired-end mode of MiSeq. All sequence reads were extracted in FASTQ format using MiSeq Reporter v2.3.32. Mapping to canonical sequence of human genome (hg19) was performed by bismark v.0.7.7 (Krueger and Andrews, 2011).

### **RNA-seq**

After depletion of ribosomal RNA by RiboZero Gold (Epicentre), we prepared libraries using the Illumina TruSeq Stranded Total RNA Sample Prep kit. The libraries were sequenced in 100 cycle Single-Read mode of HiSeq2500. All sequence reads were extracted in FASTQ format using BCL2FASTQ Conversion Software 1.8.4 in the CASAVA 1.8.2 pipeline. The sequence reads were mapped to hg19 reference genes, downloaded on 10th December 2012, using Tophat v2.0.8b (Kim et al., 2013) and quantified by RPKMforGenes (Ramskold et al., 2009), downloaded on 19th, October 2012. Gene Ontology analysis was used by David v6.7 (Huang da et al., 2009).

### **GSE accession numbers**

Microarray and RNA-seq deposited in GEO database can be accessed with the GEO accession number GSE65470 and GSE65508, respectively.

### **Motor neuron differentiation and co-culture with C2C12**

The iPSCs were dissociated into single cells and quickly re-aggregated in DFK 5% medium (DMEM/F12 medium supplemented with KSR, NEAA, 2-mercaptoethanol, L-Glutamate, SB431542, dorsomorphin and Y27632) (9000 cells/150 µl/well) using 96-well low cell-adhesion plates (Lipidure-coat U96w from Nunc)(Eiraku et al., 2008; Morizane et al., 2011) . From day 8, the cell aggregates were treated with Sonic hedgehog (100 ng/ml) and retinoic acid (1 µM) for 1 week (Wada et al., 2009). On day 20, the cell aggregates were plated onto poly-l-lysine/laminin-coated culture dishes in neurobasal medium (Gibco) supplemented with the neurotrophic factors GDNF, BDNF and NT3 (10 ng/ml, R & D Systems). The medium was changed every 3-4 days thereafter.

For the co-culture with neuronal cells, the fusion of C2C12 myoblasts was induced by switching to the differentiation medium (DMEM supplemented with horse serum). On day 4, the MNs that had differentiated from the iPSCs (differentiation days 34-54) were harvested and plated on the induced myotubes, and the medium was changed to Neurobasal medium containing neurotrophic factors (BDNF, GDNF, NT3; 10 ng/ml each). Thereafter, the cultures were fed every two days by changing half of the medium.

#### **VPA treatment**

Co-cultured samples were treated with or without 1 mM VPA by changing half of the medium every two days. After six days of drug treatment, the area of NF and  $\alpha$ BTX immunostaining was detected by immunocytochemistry and was analyzed by the IN Cell Analyzer 2000 software program.

#### **PMO treatment**

Designed PMOs SMN2E7D(-10-29) for suppressing splice silencing motifs in intron 7 of *SMN2* (Mitrpant et al., 2013) and its negative control were purchased from GENE TOOLS. SMN- or Ctrl-PMO (10  $\mu$ M in medium) were introduced with the Endo-Porter (GENE TOOLS) on day 1 of co-culturing, and the cells were subsequently cultured for three days.

**Statistics.** Statistic functions in Microsoft Excel 2013 was used for statistical analyses. Results are expressed as mean  $\pm$  SEM. Statistical significance was determined using Student's t test and Wilcoxon rank sum test.  $P < 0.05$  was considered significant. 'n' represents the number of independent experiments.

## Supplemental References

Burrell, A., Foy, C., and Burns, M. (2011). Applicability of three alternative instruments for food authenticity analysis: GMO identification. *Biotechnology research international* 2011, 838232.

Eiraku, M., Watanabe, K., Matsuo-Takasaki, M., Kawada, M., Yonemura, S., Matsumura, M., Wataya, T., Nishiyama, A., Muguruma, K., and Sasai, Y. (2008). Self-organized formation of polarized cortical tissues from ESCs and its active manipulation by extrinsic signals. *Cell stem cell* 3, 519-532.

Huang da, W., Sherman, B.T., and Lempicki, R.A. (2009). Systematic and integrative analysis of large gene lists using DAVID bioinformatics resources. *Nat Protoc* 4, 44-57.

Kim, D., Pertea, G., Trapnell, C., Pimentel, H., Kelley, R., and Salzberg, S.L. (2013). TopHat2: accurate alignment of transcriptomes in the presence of insertions, deletions and gene fusions. *Genome Biol* 14, R36.

Krueger, F., and Andrews, S.R. (2011). Bismark: a flexible aligner and methylation caller for Bisulfite-Seq applications. *Bioinformatics* 27, 1571-1572.

Mitropant, C., Porensky, P., Zhou, H., Price, L., Muntoni, F., Fletcher, S., Wilton, S.D., and Burghes, A.H. (2013). Improved antisense oligonucleotide design to suppress aberrant SMN2 gene transcript processing: towards a treatment for spinal muscular atrophy. *PLoS One* 8, e62114.

Morizane, A., Doi, D., Kikuchi, T., Nishimura, K., and Takahashi, J. (2011). Small-molecule inhibitors of bone morphogenic protein and activin/nodal signals promote highly efficient neural induction from human pluripotent stem cells. *J Neurosci Res* 89, 117-126.

Okita, K., Matsumura, Y., Sato, Y., Okada, A., Morizane, A., Okamoto, S., Hong, H., Nakagawa, M., Tanabe, K., Tezuka, K., *et al.* (2011). A more efficient method to generate integration-free human iPS cells. *Nat Methods* 8, 409-412.

Ramskold, D., Wang, E.T., Burge, C.B., and Sandberg, R. (2009). An abundance of ubiquitously expressed genes revealed by tissue transcriptome sequence data. *PLoS Comput Biol* 5, e1000598.

van der Steege, G., Grootsholten, P.M., van der Vlies, P., Draaijers, T.G., Osinga, J., Cobben, J.M., Scheffer, H., and Buys, C.H. (1995). PCR-based DNA test to confirm clinical diagnosis of autosomal recessive spinal muscular atrophy. *Lancet* 345, 985-986.

Wada, T., Honda, M., Minami, I., Tooi, N., Amagai, Y., Nakatsuji, N., and Aiba, K. (2009). Highly efficient differentiation and enrichment of spinal motor neurons derived from human and monkey embryonic stem cells. *PLoS one* 4, e6722.
